# Supplementary material for: Development of real-time PCR and loop-mediated isothermal amplification (LAMP) assays for the differential detection of digital dermatitis associated treponemes
Source: PubMed Central journal article supplement (PMC5444799; doi:10.1371/journal.pone.0178349), 2017-05-25
Supplement: pone.0178349.s001.pdf [file pone.0178349.s001.pdf]

S1 Figure. Real-time PCR treponeme phylotype standard curves.

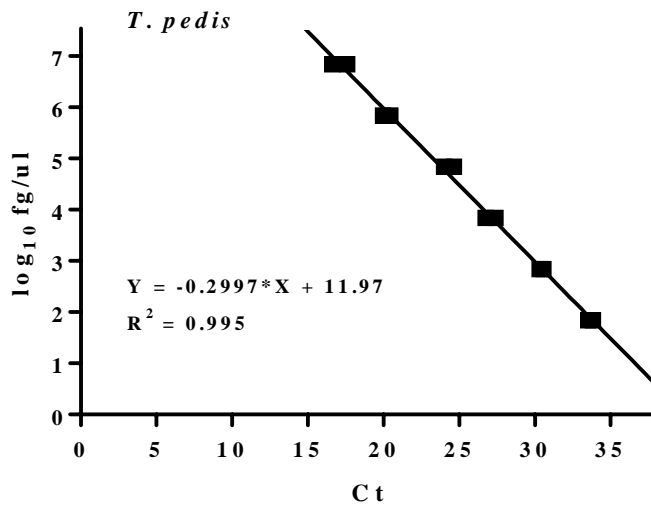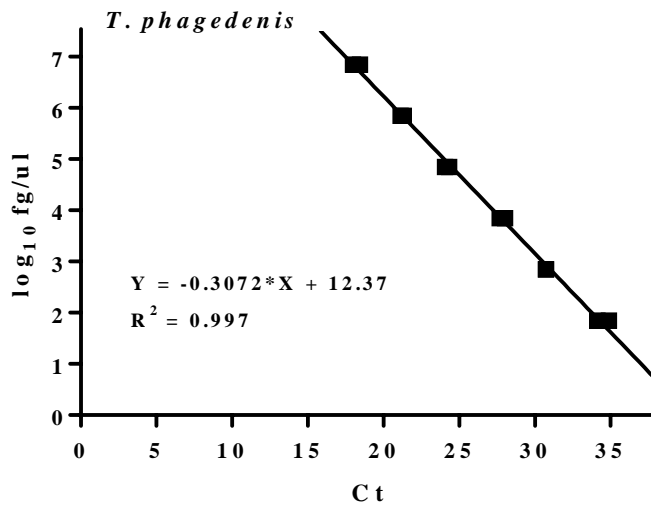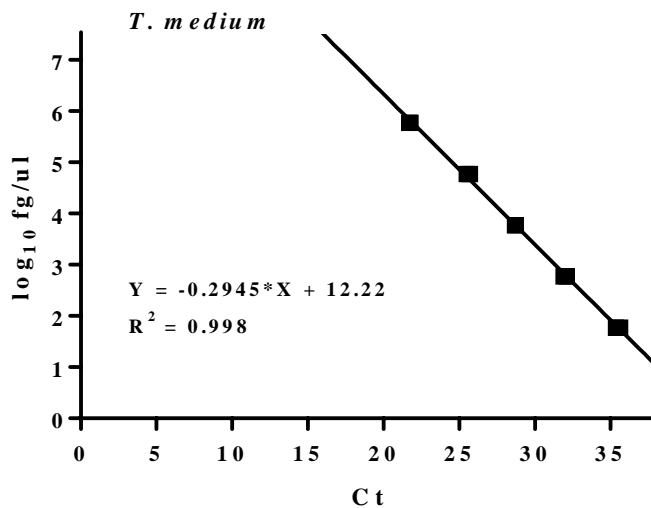

S1 Figure. Standard curves were determined by plotting the Ct value obtained from amplification of each phylotype target sequence against DNA concentration (log fg/μl) for each dilution. Ct represents the real-time PCR cycle at which fluorescence reaches the threshold value.
