# Supplementary material for: Development of real-time PCR and loop-mediated isothermal amplification (LAMP) assays for the differential detection of digital dermatitis associated treponemes
Source: PubMed Central journal article supplement (PMC5444799; doi:10.1371/journal.pone.0178349), 2017-05-25
Supplement: pone.0178349.s002.pdf [file pone.0178349.s002.pdf]

S1Table. Specificity results for the real-time PCR and LAMP assays.

| #  | Bacterial Strain                  | <i>T. species</i><br>LAMP | <i>T. pedis</i><br>LAMP | <i>T. phagedenis</i><br>LAMP | <i>T. medium</i><br>LAMP | <i>T. pedis</i><br>PCR | <i>T. phagedenis</i><br>PCR | <i>T. medium</i><br>PCR |
|----|-----------------------------------|---------------------------|-------------------------|------------------------------|--------------------------|------------------------|-----------------------------|-------------------------|
| 1  | <i>T. pedis</i> 1-9185            | +                         | +                       | -                            | -                        | +                      | -                           | -                       |
| 2  | <i>T. pedis</i> AP                | +                         | +                       | -                            | -                        | +                      | -                           | -                       |
| 3  | <i>T. pedis</i> AW                | +                         | +                       | -                            | -                        | +                      | -                           | -                       |
| 4  | <i>T. pedis</i> tA                | +                         | +                       | -                            | -                        | +                      | -                           | -                       |
| 5  | <i>T. pedis</i> tB                | +                         | +                       | -                            | -                        | +                      | -                           | -                       |
| 6  | <i>T. pedis</i> CA                | +                         | +                       | -                            | -                        | +                      | -                           | -                       |
| 7  | <i>T. phagedenis</i> 2-1498       | +                         | -                       | +                            | -                        | -                      | +                           | -                       |
| 8  | <i>T. phagedenis</i> AF           | +                         | -                       | +                            | -                        | -                      | +                           | -                       |
| 9  | <i>T. phagedenis</i> AH           | +                         | -                       | +                            | -                        | -                      | +                           | -                       |
| 10 | <i>T. phagedenis</i> AT           | +                         | -                       | +                            | -                        | -                      | +                           | -                       |
| 11 | <i>T. phagedenis</i> AV           | +                         | -                       | +                            | -                        | -                      | +                           | -                       |
| 12 | <i>T. phagedenis</i> BA           | +                         | -                       | +                            | -                        | -                      | +                           | -                       |
| 13 | <i>T. phagedenis</i> AC           | +                         | -                       | +                            | -                        | -                      | +                           | -                       |
| 14 | <i>T. phagedenis</i> AM           | +                         | -                       | +                            | -                        | -                      | +                           | -                       |
| 15 | <i>T. phagedenis</i> CD           | +                         | -                       | +                            | -                        | -                      | +                           | -                       |
| 16 | <i>T. phagedenis</i> CV           | +                         | -                       | +                            | -                        | -                      | +                           | -                       |
| 17 | <i>T. phagedenis</i> CG           | +                         | -                       | +                            | -                        | -                      | +                           | -                       |
| 18 | <i>T. phagedenis</i> CZ           | +                         | -                       | +                            | -                        | -                      | +                           | -                       |
| 19 | <i>T. phagedenis</i> IA           | +                         | -                       | +                            | -                        | -                      | +                           | -                       |
| 20 | <i>T. phagedenis</i> 977          | +                         | -                       | +                            | -                        | -                      | +                           | -                       |
| 21 | <i>T. phagedenis</i> 221          | +                         | -                       | +                            | -                        | -                      | +                           | -                       |
| 22 | <i>T. phagedenis</i> 749          | +                         | -                       | +                            | -                        | -                      | +                           | -                       |
| 23 | <i>T. phagedenis</i> T28          | +                         | -                       | +                            | -                        | -                      | +                           | -                       |
| 24 | <i>T. phagedenis</i> 224          | +                         | -                       | +                            | -                        | -                      | +                           | -                       |
| 25 | <i>T. medium</i> 923L             | +                         | -                       | -                            | +                        | -                      | -                           | +                       |
| 26 | <i>T. medium</i> CL               | +                         | -                       | -                            | +                        | -                      | -                           | +                       |
| 27 | <i>T. medium</i> CN               | +                         | -                       | -                            | +                        | -                      | -                           | +                       |
| 28 | <i>T. medium</i> CO               | +                         | -                       | -                            | +                        | -                      | -                           | +                       |
| 29 | <i>T. medium</i> DB               | +                         | -                       | -                            | +                        | -                      | -                           | +                       |
| 30 | <i>T. medium</i> 916M             | +                         | -                       | -                            | +                        | -                      | -                           | +                       |
| 31 | <i>T. medium</i> 916N             | +                         | -                       | -                            | +                        | -                      | -                           | +                       |
| 32 | <i>T. medium</i> 916T             | +                         | -                       | -                            | +                        | -                      | -                           | +                       |
| 33 | <i>T. medium</i> 923D             | +                         | -                       | -                            | +                        | -                      | -                           | +                       |
| 34 | <i>T. medium</i> 923K             | +                         | -                       | -                            | +                        | -                      | -                           | +                       |
| 35 | <i>Bacillus cereus</i>            | -                         | -                       | -                            | -                        | -                      | -                           | -                       |
| 36 | <i>Bacillus fragilis</i>          | -                         | -                       | -                            | -                        | -                      | -                           | -                       |
| 37 | <i>Borrelia burgdorferi</i>       | -                         | -                       | -                            | -                        | -                      | -                           | -                       |
| 38 | <i>Brachyspira hyodysenteriae</i> | -                         | -                       | -                            | -                        | -                      | -                           | -                       |
| 39 | <i>Dichelobacter nodosus</i>      | -                         | -                       | -                            | -                        | -                      | -                           | -                       |
| 40 | <i>Fusobacterium necrophorum</i>  | -                         | -                       | -                            | -                        | -                      | -                           | -                       |
| 41 | <i>Fusobacterium nucleatum</i>    | -                         | -                       | -                            | -                        | -                      | -                           | -                       |
| 42 | <i>Porphyromonas levii</i>        | -                         | -                       | -                            | -                        | -                      | -                           | -                       |
| 43 | <i>Streptococcus dysgalactiae</i> | -                         | -                       | -                            | -                        | -                      | -                           | -                       |
| 44 | <i>Prevotella denticola</i>       | -                         | -                       | -                            | -                        | -                      | -                           | -                       |
| 45 | <i>Citrobacter freundii</i>       | -                         | -                       | -                            | -                        | -                      | -                           | -                       |
| 46 | <i>Enterobacter taylorae</i>      | -                         | -                       | -                            | -                        | -                      | -                           | -                       |
| 47 | <i>Enterobacter aerogenes</i>     | -                         | -                       | -                            | -                        | -                      | -                           | -                       |

|    |                                 |   |   |   |   |   |   |   |
|----|---------------------------------|---|---|---|---|---|---|---|
| 48 | <i>Enterococcus faecalis</i>    | - | - | - | - | - | - | - |
| 49 | <i>Escherichia coli</i> K-12    | - | - | - | - | - | - | - |
| 50 | <i>Escherichia coli</i> O157    | - | - | - | - | - | - | - |
| 51 | <i>Klebsiella ozanae</i>        | - | - | - | - | - | - | - |
| 52 | <i>Leptospira interrogans</i> B | - | - | - | - | - | - | - |
| 53 | <i>Leptospira interrogans</i> G | - | - | - | - | - | - | - |
| 54 | <i>Leptospira interrogans</i> H | - | - | - | - | - | - | - |
| 55 | <i>Listeria monocytogenes</i>   | - | - | - | - | - | - | - |
| 56 | <i>Pseudomonas aeruginosa</i>   | - | - | - | - | - | - | - |
| 57 | <i>Salmonella enteritidis</i>   | - | - | - | - | - | - | - |
| 58 | <i>Staphylococcus aureus</i>    | - | - | - | - | - | - | - |
| 59 | <i>Shigella dysenteriae</i>     | - | - | - | - | - | - | - |
| 60 | <i>Yersinia enterocolitica</i>  | - | - | - | - | - | - | - |

---
